# Supplementary material for: First-principles study of Ce-doped Y3Al5O12with Si–N incorporation: electronic structures and optical properties
Source: Royal Society of Chemistry journal article supplement (doi:10.1039/c6tc01691j), 2016-01-01

## Supporting Information

# First-principles study of Ce-doped $\text{Y}_3\text{Al}_5\text{O}_{12}$ with Si–N incorporation: electronic structures and optical properties†

Lixin Ning,<sup>\*,a</sup> Xiaowen Ji,<sup>a</sup> Yuanyuan Dong,<sup>a</sup> Wei Jin,<sup>a</sup> Yucheng Huang,<sup>a</sup>  
Zaifa Pan,<sup>b</sup> Peter A. Tanner<sup>\*,c</sup>

<sup>a</sup> Center for Nano Science and Technology, Department of Physics, Anhui Normal University,  
Wuhu, Anhui 241000, China. \*E-mail: ninglx@mail.ahnu.edu.cn

<sup>b</sup> College of Chemical Engineering, Zhejiang University of Technology, Hangzhou 310014,  
China.

<sup>c</sup> Department of Science and Environmental Studies, The Hong Kong Institute of Education,  
New Territories, Hong Kong S.A.R., China. \*E-mail: peter.a.tanner@gmail.com

**Table S1** Calculated lattice parameters and volumes for YAG, YAG:Ce, YAG:Si<sub>Al(tet)</sub>-N<sub>O</sub>, and YAG:Ce,Si<sub>Al<sub>i</sub></sub>-N<sub>O<sub>i</sub></sub> (*i* = 1, 2). In the last row, the percent changes of the 2<sup>nd</sup> and 3<sup>rd</sup> columns were taken with respect to the volume of YAG (1<sup>st</sup> Column), and the percent changes of the 4<sup>th</sup> and 5<sup>th</sup> columns were taken with respect to the volume of YAG:Ce (2<sup>nd</sup> column).

|                          | YAG      | YAG:Ce    | YAG:<br>Si <sub>Al(tet)</sub> -N <sub>O</sub> | YAG:Ce,<br>Si <sub>Al1</sub> -N <sub>O1</sub> | YAG:Ce,<br>Si <sub>Al2</sub> -N <sub>O2</sub> |
|--------------------------|----------|-----------|-----------------------------------------------|-----------------------------------------------|-----------------------------------------------|
| <i>a</i> (Å)             | 12.000   | 12.016    | 11.986                                        | 11.999                                        | 12.022                                        |
| <i>b</i> (Å)             | 12.000   | 12.007    | 11.994                                        | 12.014                                        | 12.004                                        |
| <i>c</i> (Å)             | 12.000   | 12.007    | 11.970                                        | 12.005                                        | 11.990                                        |
| <i>α</i> (deg)           | 90.000   | 90.056    | 90.077                                        | 89.998                                        | 90.059                                        |
| <i>β</i> (deg)           | 90.000   | 90.000    | 90.000                                        | 89.976                                        | 89.917                                        |
| <i>γ</i> (deg)           | 90.000   | 90.000    | 89.983                                        | 89.922                                        | 90.012                                        |
| Volume (Å <sup>3</sup> ) | 1728.000 | 1732.334  | 1720.816                                      | 1730.567                                      | 1730.387                                      |
|                          |          | (+0.251%) | (-0.416%)                                     | (-0.102%)                                     | (-0.112%)                                     |

**Fig. S1** Calculated total and orbital projected DOSs for YAG:Ce with the NN  $\text{Si}_{\text{Al2}}\text{-N}_{\text{O2}}$  substitution. The occupied  $\text{Ce}^{3+}$  4f state is indicated by the dashed line, and its energy position with respect to the host VBM is indicated.

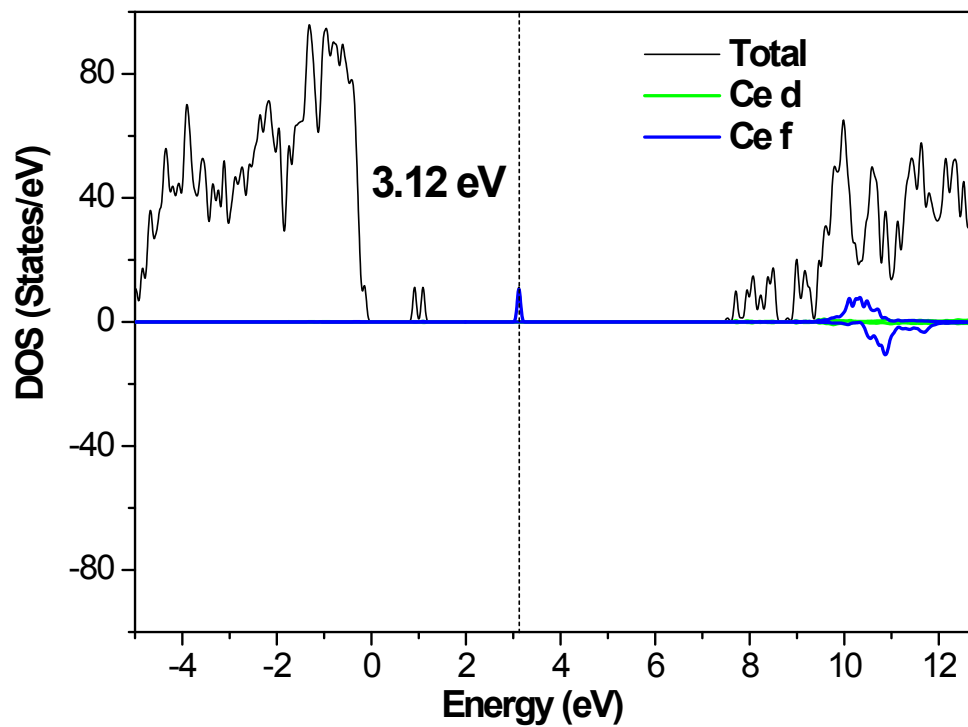

Supplement: c6tc01691j1.pdf [file c6tc01691j1.pdf]
